# Supplementary material
Source: publisher figshare collection journal article supplement (https://brill.figshare.com/articles/dataset/_/9164189)
Supplement: Supplementary file 1 [file 1]

# **The Dynamic Double Flash Illusion: Auditory Triggered Replay of Illusory Visual Expansion**

**Noelle R.B. Stiles<sup>1,2,\*</sup> Armand R. Tanguay, Jr.<sup>2,3</sup> and Shinsuke Shimojo<sup>2</sup>**

<sup>1</sup> Department of Ophthalmology, University of Southern California, Los Angeles, CA, USA

<sup>2</sup> Division of Biology and Biological Engineering, and Computation and Neural Systems Program, California Institute of Technology, Pasadena, CA, USA

<sup>3</sup> Departments of Electrical Engineering-Electrophysics, Chemical Engineering and Materials Science, Biomedical Engineering, Ophthalmology, and Physics and Astronomy; Neuroscience Graduate Program, University of Southern California, Los Angeles, CA, USA

Received 21 December 2018; accepted 17 July 2019

\* To whom correspondence should be addressed. E-mail: [nstiles@caltech.edu](mailto:nstiles@caltech.edu)

## **Supplementary Material**

**Video S1.** A Demonstration of the Dynamic Double Flash Illusion. This movie plays an example demonstration of the Dynamic Double Flash Illusion. For best perception, size the video to fill the full computer screen, and turn up the audio of your computer to the maximum setting.
